# Supplementary material for: Chemically Dual-Modified Biochar for the Effective Removal of Cr(VI) in Solution
Source: MDPI journal article supplement (doi:10.3390/polym14010039), 2021-12-23
Supplement: s1 [file s1]

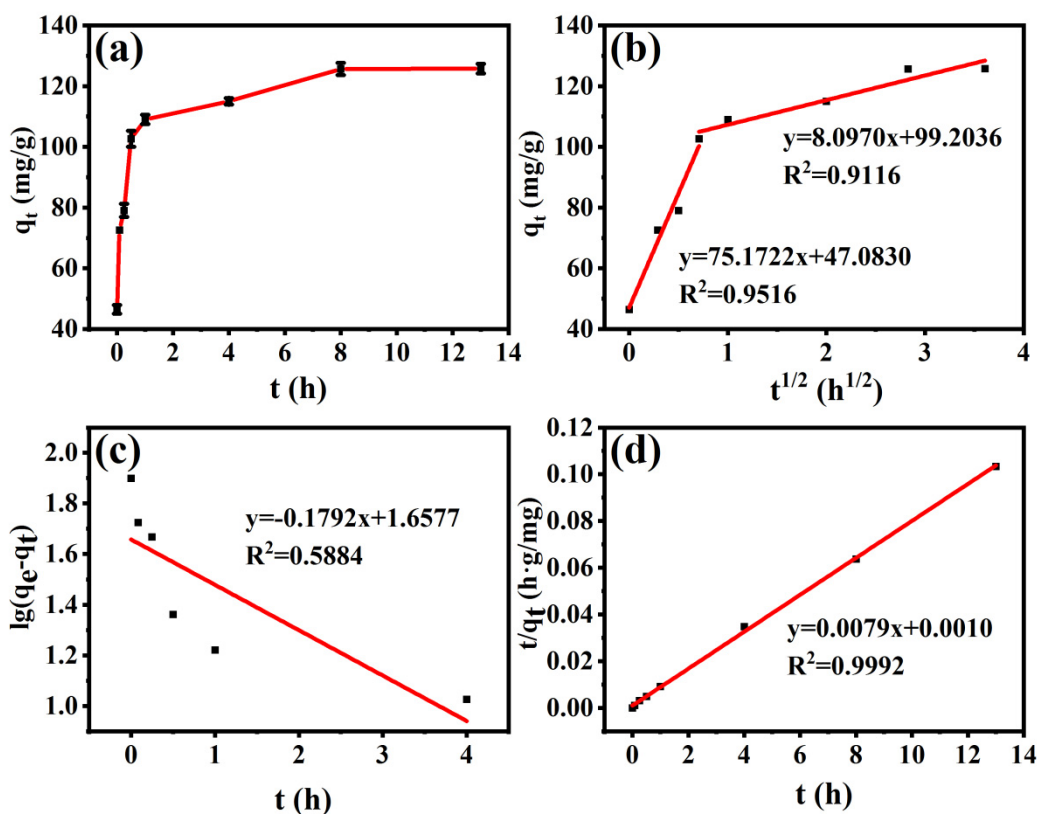

**Figure S1.** Effect of contact time on the removal of Cr(VI) (a), Weber-Morris intra-particle diffusion model (b), pseudo-first order model (c) and pseudo-second order model (d) for Cr(VI) adsorption of AMKBC<sub>3/4</sub>. (pH=3, T=0-13 h, m=0.01 g, V=15 mL, C<sub>0</sub>=100 mg L<sup>-1</sup>)

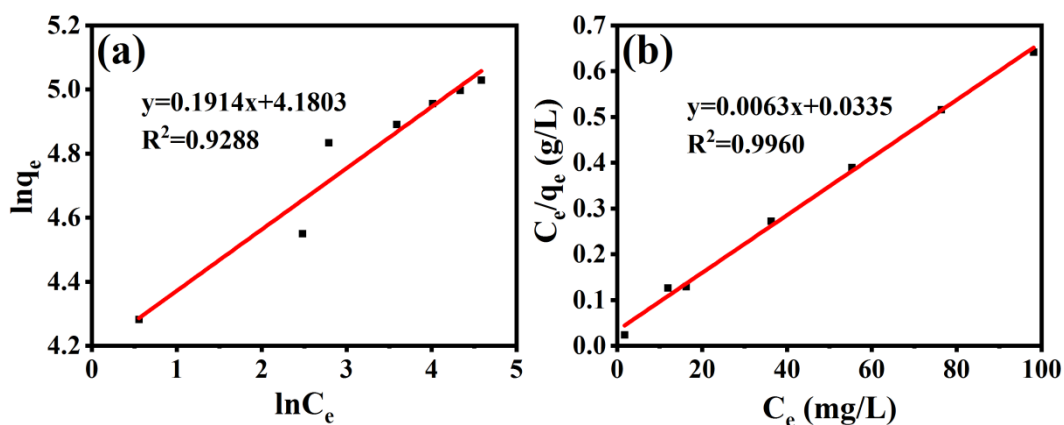

**Figure S2.** Langmuir isotherm (a) and Freundlich isotherm (b) for Cr(VI) adsorption of AMKBC<sub>3/4</sub>. (pH=3, T=13 h, m=0.01 g, V=15 mL, C<sub>0</sub>=50-200 mg L<sup>-1</sup>)

**Table S1** Elemental content of adsorbents

| Adsorbent            | C(wt%) | O(wt%) | Al(wt%) | Mn(wt%) |
|----------------------|--------|--------|---------|---------|
| BC                   | 86.4   | 13.6   | /       | /       |
| KBC                  | 92.6   | 7.4    | /       | /       |
| AMKBC <sub>3/4</sub> | 83.3   | 11.5   | 4.5     | 0.7     |

**Table S2.** DFT calculated adsorption energy (E<sub>ads</sub>, eV) of HCrO<sub>4</sub><sup>-</sup> and Cr<sub>2</sub>O<sub>7</sub><sup>2-</sup> for the favored adsorption configurations on MnO (001) and Al<sub>2</sub>O<sub>3</sub> (010).

| -                                    | HCrO <sub>4</sub> <sup>-</sup> | Cr <sub>2</sub> O <sub>7</sub> <sup>2-</sup> |
|--------------------------------------|--------------------------------|----------------------------------------------|
| MnO(001)                             | -0.52                          | -0.21                                        |
| Al <sub>2</sub> O <sub>3</sub> (010) | -1.64                          | -2.01                                        |
